# Supplementary material
Source: publisher site journal article supplement (https://www.dovepress.com/get_supplementary_file.php?f=300569.docx)
Supplement: Supplementary file 1 [file get_supplementary_file.php]

**Supplementary Information**


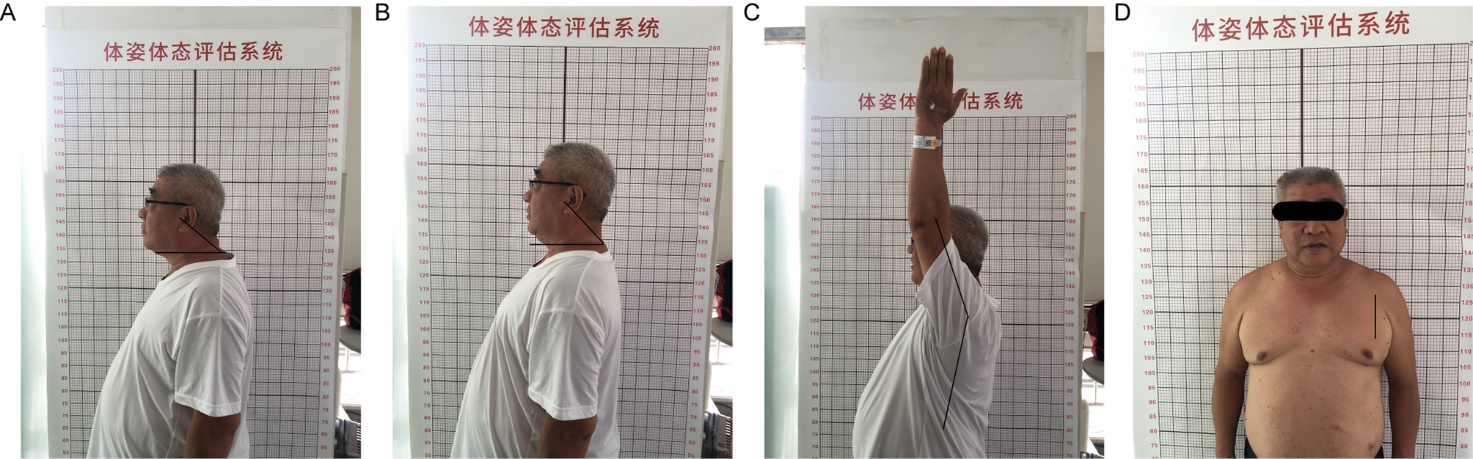


**Supplementary Figure 1. Measurement of Neck/shoulder mobility. (**A) maximum head protraction; (B) maximum head retraction; (C) shoulder flexion ROM; (D) the non-dominant PmM length.

**Abbreviations:** ROM, range of motion; PmM, pectoralis minor muscle.
